# Supplementary material for: Identification of two conserved aspartic acid residues required for DNA digestion by a novel thermophilic Exonuclease VII in Thermotoga maritima
Source: PubMed Central journal article supplement — Nucleic Acids Res. 2008 Sep 23;36(18):5992–6003. doi: 10.1093/nar/gkn588 (PMC2566859; doi:10.1093/nar/gkn588), 2008-09-23
Supplement: gkn588_1.pdf [file gkn588_1.pdf]

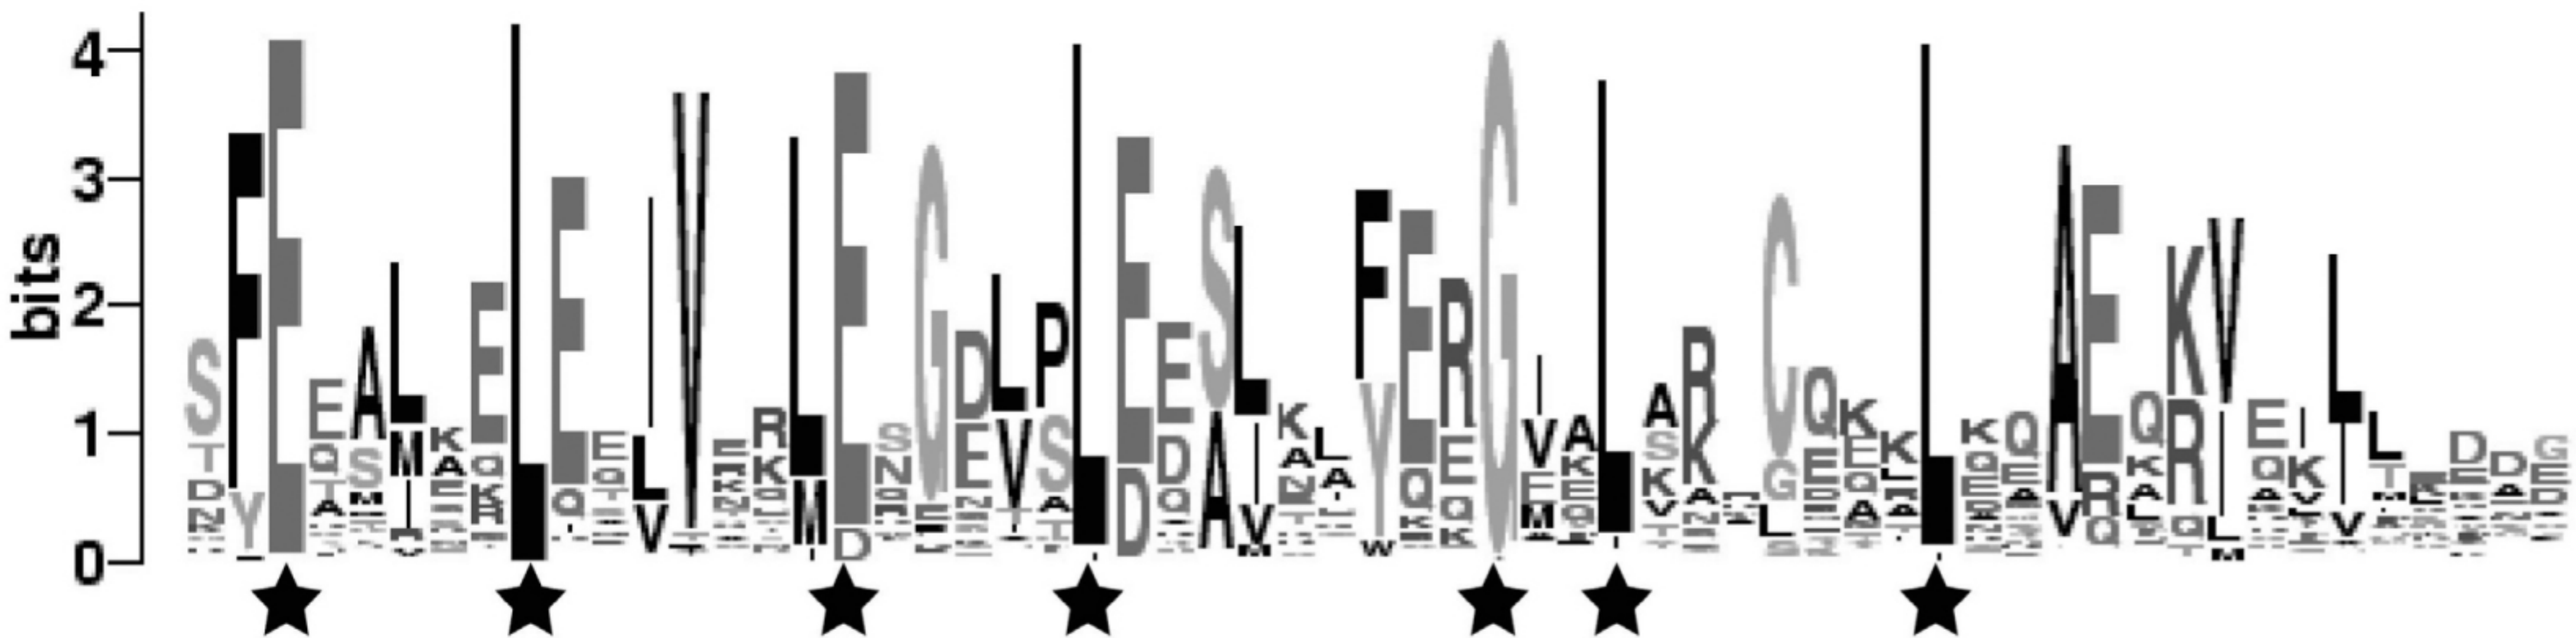

|                               | OB-Fold                                                                                             | ExoVII_Large                                                                                                                                                                                         |
|-------------------------------|-----------------------------------------------------------------------------------------------------|------------------------------------------------------------------------------------------------------------------------------------------------------------------------------------------------------|
| <i>E. coli</i> K12            | -----MLPQSPAIF-----TVSRNLQTVRLLLEH--MGQVWISGELSNFTQPA-SGHWYFTLKDDTAQVRCAM--FRNSNRRV                 | TFRPQHQQVLRANITLYEPRGDYQIIVESMQ-PAGEGLLQKQYELKAKLQAEGLFDQYKPLPSPAHCVGVITSKTGAALHDLHLVLRKRRDPSLPVVIYPAAVQGDAPGQIVRAIELANQ----                                                                         |
| <i>T. maritima</i> MSB8       | -----MKDYTY-----SVTEINEYIKDLIEGDPYLTNVSYGELISGVRPR--KGIHFSSVEENARLECVI--FGG--DNM                    | GIRLQEGRMALVEGSSVSYIIPHGTYRIFCSNRYLDQAGMYQIKFETTLLKRLLEEGLLS-RPKRTVPRFPRKIGLITSRDSAAQDQVIRTARERKAPIELIYVFTSVQGSAREELIKALRKANE-----YDLDLVMIIVRGGGSKEDLWSEFNDEVARAIFTSRIPVVSVAHGHEADVTLDLQVADLRAPTPSAA |
| <i>C. tepidum</i> TLS         | -----MIKTAQ-----SVGELTRAIKNELES--FPFVRVKGELSNVKQHS-SGHVYLTLDKDESAQTPAVI--WKSVRARS                   | PLELRDGLVIAEGRLEVWPPAGRYQLICTALF-ETGEGQRALALERLIAMAKAGWDAERKPKIPRIPRRIGMITSPTGAVIRDMSDVFAARRFPAAELLLYPVQVQGERAVESTVRAIRYFNDPPKPEHKPDVLIIVRGGGSSEDLQAFNDEVAEAAYRSAPVYSVAHGHEADLQVADLRAPTPSAA          |
| <i>L. acidophilus</i> NCFM    | -----MAENKY-----LTVTDLNYYITQKFNKDPYLRKVFLOGELSNFRYRR-NSHQYFSLKDEKSKINVMV--FRSYFDKV                  | KFKPEEGMKVYVTVGVSVYGPQGSYQFYAENME-PAGLQALYEQLKQLQVLRKEGLFNPEHKKIPRFPDRIAVVTASGAVIHDIMVTANRRFPHAEIDLFPQVQGDAAESLVRAMQIAA--EGDKYDVMIIIGRGGGSLEDLWSEFNDEVARAIFTSRIPVVSVAHGHEADVTLDLQVADLRAPTPSAA        |
| <i>B. parapertussis</i> 12822 | -----MTIGLSVTNDVFARDIL-----TVAQLNQAVGQLLERS--IPSLWVRGEISNFTQAA-SGHWYFTLKDSRAAVRTVM--FRSRAAQV        | GFVPRPGDQVEVRAVRSLYEPRGDYQLQADGMR-RAGVGNLYEAFRLRKAQDDEGLFDQYKPLPSPAHCVGVITSKTGAALHDLHLVLRKRRDPSLPVVIYPAAVQGDAPGQIVRAIELANQ----                                                                       |
| <i>B. subtilis</i>            | -----MGEAAY-----VTYSALTKYIKRKFVDPHLENLWIKGELSNVKIHT-RGHIYFTLKERRKGRMQSVM--FARQSERL                  | PFKPEGMKVLVRRGGSVSYEYPSGNYQYAKEMQ-PDGVGALYAYEELKLLKAGEGLFDDRYKQIPAFPATIGVVTSPGTAAVVDVITTLKRRYPLVKVIVLPAVVOGENASRSIVTRIEEANE--KEICDVLIVRGGGSLEDLWSEFNDEVARAIFTSRIPVVSVAHGHEADVTLDLQVADLRAPTPSAA       |
| <i>M. tuberculosis</i> H37Rv  | -----MTQNSAENPF-----FVRAVAIRVAGWIK--LGAVWVEGQLAQITMRPDAKTVMVLRDPAADMSLTVI--CSRDLVLSA                | FVKLAEGVQVVVCGKPSFYTGRTFSLRLSEIR-AVGIGELLARIDRLRRLDAEGLFDPRIKRPYPYLPNMIGLITGRASAAERDVTVASARWPAARFAVRNVAVQGNVAVGQIVAEALRELDL--DPDQVIVIVRGGGSLEDLWSEFNDEVARAIFTSRIPVVSVAHGHEADVTLDLQVADLRAPTPSAA       |
| <i>H. pylori</i> J99          | -----MHVL-----SVSEINAQIKALLEAT--FLQVRVCGEVSNTLTHKVSCHAYFSLKDSQSVIRCVL--FKGNANRL                     | KFALKEQEMVVFVGGISVYAPRGDYQINCFEIE-PKEIGSLTLALEQLKELRLKGYFDEANKLPKPNFPKRVAIVTSQNSAAWADMKKIASKRWPMECLVCINTLQEGECVQSVVESIAYADSFYDTKNAFDAIVVARGGSMEDLWSEFNDEKIDALYLAKTFSMSAIGHESDFLLSDVADLRAPTPSAA       |
| <i>M. capricolum</i>          | -----MKTIL-----SVQELNESLKTFFIEPDYFKNIYKGEISNLTFNK-SGHVYFSLKDNAAINCMV--WKSNTQKL                      | SLNLEDGMQIICHGRLYYIPTGRVSEAKDIQ-IYIGDLQKIYEQRYKDLKQAGWFDQNLKPKPEFKNVGIITASSGAAIHDLITTHRRLPLINILYFPQVQQAQSEIDIANKIKQAND--FKIKLDVLIIVRGGGSLEDLWSEFNDEVARAIFTSRIPVVSVAHGHEADVTLDLQVADLRAPTPSAA          |
| <i>E. canis</i> str. Jake     | -----MIEPF-----TVSELTKIFQNFVHET--FTHIKVRGEISNLSQPK-SGHTYFTLKDDDAVINAVC--WNN--TKI                    | EFDLKNGLVFCGFLTTY--QSKYQLITESML-LAGIGNLKMILEQRKAKLEKEGLFNQSKKHLPLLPKIIIGVITSTTGAVINDLNRVRSRFPF-HIVISPVSVQNEAINQIINAIKLN--SDINRPDVIIVRGGGSLEDLWSEFNDEVARAIFTSRIPVVSVAHGHEADVTLDLQVADLRAPTPSAA         |
| <i>T. denticola</i>           | -----MAQTY-----SVYEITLQIKELLES--FGVYSIEGELSNFRPSA-AGHLYFILKDEKASTQAVM--FKGKTRSL                     | SFVPKDGMTVKAEGAISVYEQGSYQIIIEEMS-LAGEGNIKMLEERKKAEEGIFDSEKPKLPYFPKRJAVVITSPTGAAVVDVIVVVKRRNEKIGIVVLPVAVQGEAAAPVLRQKIADE--KNLGDLIIVRGGGSLEDLWSEFNDEVARAIFTSRIPVVSVAHGHEADVTLDLQVADLRAPTPSAA           |
| <i>T. tengcongensis</i> MB4   | -----MQLKAF-----SVSEVTEYIKKVMNDIILNRVVRGELSNLKYH--STAVYFTLKDEGAALKCVM--FNDYSRSL                     | EFTLDQDGMVIAITGRITVYKGGYLYVQVSVQ-MDGIQALYIAFNKLKELQKEGLFDLDRKKPIPKHPRKIAVVTSPGTAVIRDIITISRRRNPVDMVVPVIVQGSAADEISNLRILNK--RKDIDVIVRGGGSLEDLWSEFNDEVARAIFTSRIPVVSVAHGHEADVTLDLQVADLRAPTPSAA            |
| <i>G. sulfurreducens</i> PCA  | -----MDIFSEKRIL-----TVSQTLSLRVLVEEN--FEHVWVEGELSNLATPA-SGHLYFTLKDGAALRCVM--FRASSRAL                 | KFRPRDGMGLIVRGRVTVYDORGEYQLLVEYLE-PRGICALQAFIQLKEGLFADEHKRPIPLPKQIGVVTSTAGAAIHDLNLVIRRRYP-VNILLSPTIVQGSAADEISNLRILNK--RKDIDVIVRGGGSLEDLWSEFNDEVARAIFTSRIPVVSVAHGHEADVTLDLQVADLRAPTPSAA               |
| <i>H. marismortui</i>         | -----MGSGPELTQTSLETQLQALQTERIT-----YVPTNEDIGAVVESADQLAFDYVYQVSDYGVSS--NDHVHLDIVHEGSTIHCVL--FGYKRSAI | DATIEDGMQVAVKGSLSYEDGGNVSVIVEDIV-EVGEFTYQRIYEQRNQLDSDGLDPEHKQALPDFPERIGIATSATSARDMDIITSIHRYPDVDIVIQNTSVQGDAMMSIMGAISELDD--DPRVDVIVRGGGSLEDLWSEFNDEVARAIFTSRIPVVSVAHGHEADVTLDLQVADLRAPTPSAA           |
| <i>M. maripaludis</i> C5      | -----MLQLTLESAPSNLTIVSELNYYVKSLEEDYLLKRASIKGELSNCTLHK-SGHVYFTLKDENSSIDCVM--FKPYAKNL                 | NFSPTGEMGVILKGVSLYAKTGYQFYCNMSM-KDGIQDLIFKFEKLKELENEGLFSEKPKKIPKYPKNIGIITSPTGAAIHDLNVIRRRYP-VNILLSPTIVQGSAADEISNLRILNK--RKDIDVIVRGGGSLEDLWSEFNDEVARAIFTSRIPVVSVAHGHEADVTLDLQVADLRAPTPSAA             |
| <i>M. burtonii</i> DSM 6242   | -----MPAY-----TVTELNLLKNTLTNNPKLNQIIVQGEISNLTKHS-SGHYYFTLKDGKSQLCVS--FKSVNRNL                       | RFELESMMKVLVFGSDVYVYVRRGQYLYVQDIR-PDGVGELYKAYEQLKNELEQEGFLSDVHKRPIPGYPLRIGVVTSPGTAAIHDLNLVIRRRYP-VNILLSPTIVQGSAADEISNLRILNK--RKDIDVIVRGGGSLEDLWSEFNDEVARAIFTSRIPVVSVAHGHEADVTLDLQVADLRAPTPSAA        |

|                               |                                                                                                                                                                                                                                |
|-------------------------------|--------------------------------------------------------------------------------------------------------------------------------------------------------------------------------------------------------------------------------|
| <i>E. coli</i> K12            | EVVSRNQQLLRQVQSTRQRLEMA-----MDYYLANRTRRFTQIHR-----LQQHPQLRLARQQTMLERLQKRMSFALENQLKRTGQQQRILT--QRNLQNPQPKIHRAQTRIQQLLEYLRAETLRAQLSATREFRGNAVTHLEAVSPLST-----LARGYSVTTA-----TDGNVLKVKQVKGAGEMITRLEDGWIESEVKNIQPVKKSRRKVH---      |
| <i>T. maritima</i> MSB8       | EVVVPDASEIHEDLDSFFEKLITS-----LSNRFDMEERRLETLYFR-----LRMIGRRKLELNEFKIERVKELAAKRLKRLMDYFEHNRKQLDLSGRMLSESLNPLRP-----LERGFVIVK-----KDEKIVKESTDLRKGDVSLVFKDGTAKAQVIG--                                                             |
| <i>C. tepidum</i> TLS         | ERAVPDREELLRLIDNLVNRQSIL--MEGLISGAQLQVDSIT-----SSYAFNRPVQMLGQFEERLALMEKEMKRAIAEKVRDREQQLTAAADRILAMLDINRT-----LKRGFALVT-----QDDRYVTSAKSLEADAKGLTFHDGQREARVTE-----                                                               |
| <i>L. acidophilus</i> NCFM    | EYATPNLMDELAGIHQLQSRLFSS--MQTIIRKRDRLNRIONS-----IIMREPTRLYDQIETVDRKLRQLNSMKNLDSKQDYRLLN--QRLFAVNPDKQINQMQRFLAKRLSDNMQHYLKDKNRIFAQIVQQDDYSPLKT-----LERGFVYTTD-----RDGKTISSVKQVKNKNSLNLHFKDGQVAAKVVEVKEEKANEEK-----              |
| <i>B. parapertussis</i> 12822 | ELACVPRGDLAALRHTAERLARA--QRRRLQAAQRDRAA--AMLTSPAQLAHQQRERLNTLRHLASAWRPGQRRVARLDMLA--QRLAHRRPDT--GRAAERSAALLAQLGRAQARLAAARQARLDTLAAQRLALDPQHT-----LARGYAIVRD-----AAGAIYDTRLAARDREIAVARGRIGADVTDIGTDPDGTGDPALRRG                 |
| <i>B. subtilis</i>            | EIAVPHTTDLIERTKTAEVRMTRA--MQHLGQEKGRIQTLQSS-----YAFRFPKRLYAQKEQQFDLAYQQFQAQLTALLDRKSRQLERET--YRLEALHPHEQLKQARTRYQEQTNRQLRKMNMIQMQLHSQQTVLGKLNALSPLQV-----MERYGSLAY-----KEDKLKSVSQIEEQDRLEIKLKGVLTCVLEKRGEEK-----               |
| <i>M. tuberculosis</i> H37Rv  | KKVVPDTAAEQRLIDDLRRRQAQ--LRNWNVSREQRAVAQLR-----SRPVLADPMTMVSVRAEEVHRARSTLRRNLTLMVAAETERIGHLAARLATLGAAT-----LARGYAIVQVAVQTPGEGGSEPEQLRSVHDAPEGTKLRVAVDAGALAAVSEGQTNGL--                                                         |
| <i>H. pylori</i> J99          | EILLPSSDEWLQRLDGFNVKLRHS--FKTLLHQKKAHLEHLA-----ASLKRLSFENKHHNLAKLEKLTIALDNKTLEFLRLKKTLEKISTQSTSPFLQTKTERLNRLNENALKLAYANLKLPPGALV--SKNHQAIIEALKRGDKIELSNEKARASAEILSDVRD-----                                                    |
| <i>M. capricolum</i>          | ELVSKDINEIKNKLKHYQTNKTL--ISNKLKLTNQLTDFNKENQIKFNNYLSNQYLELKLQLSAYNPNLVKKNKINSIDLKLDNDKHFIFESIKKIIILNQKEINNHSNINKQISDFLKKQITDFNFAISSFKGLISQKIKFEELSASLEKQVGLLNPLKP-----LENGFSIITN-----LNNKITSYQVKINEDLKVFLSDSKLVVTIKEVKINE----- |
| <i>E. canis</i> str. Jake     | EIVLPKTKQLVELINSRFNKIKTI--LHYKINIKKDLRFLYL-----NNLMKTKHKIKVKLQLELHKSQIVELVKIMLLNKRQSNELYYKINQFNKEKI-----LEAGYAVIYD-----TNNHNSIKKIQSNDIISIELKDGIVAEIIK-----                                                                     |
| <i>T. denticola</i>           | ELAAPILNDIMYSIAVNRDLTQN--TENRIERINLMLNFK-----PDSLELFRNIIQQPLLARFDNAKEELSGMGERCKDLQRLLVNLKILEGANQGI-----LDRGYSIVRNA-----QGTGKTRISFSQVKEGAEALIQPSKGTIEAEVVKRVSS-----                                                             |
| <i>T. tengcongensis</i> MB4   | ELVVDPDIKVVQRELFLKTKIMNL--MKAQVLSKKEFEGLK-----RALYLNPIKKNVQLKRVKLNKSLTKEMLSIFNQQKNELLVNEKLDLSPLKV-----LTRGYTIVLN-----KEGQVITSSRKVKTSEEVGILFSDGRATAVVKEVKEDGERI-----                                                            |
| <i>G. sulfurreducens</i> PCA  | ELVVKSKEELAAARLEFLRHLVQ--GRQVLAERRGELDSL--RSLRDPMSLVGHLSQRVDDL SARLERTANSVRRHRGSLDLLT--TNLRLTNPAVLERARERVALAGRNETLRLRFLDHLREKTLVAAAARDTSLPLAT-----MARGYSIVLKL-----PERCLVTSARLAPGDRVELCLRGRGACCVSSSDT--                         |
| <i>H. marismortui</i>         | N-IVPERTLEAELETLEERLNTAYTETAETTLTMDRLTRAY-----RRTVESDLSAFEALDRTYDTHVRD--ETDLANKLEQARTQYD-----QQR-----EREQVAHR--QRRRLILILVALGLLVVALLYIILLPL-----                                                                                |
| <i>M. maripaludis</i> C5      | ELTVYNEHELKSIIDNFERILKHR--IKIEIANRSYELDILY-----SKIEKNSPKSIEKQLHIDRIMTLNHEIKNRISEYELKRFESYSLLNAYNPLNV-----LNKGYSIID-----ENEKISSKNLKTENDVKITLKDGTVDAAHTLKE-----                                                                  |
| <i>M. burtonii</i> DSM 6242   | ELVVDPQEVKRHLATLSSRELE--VEHVISQKGRLEQIR-----KKLEPQHIMDMLIQDSQYLDLTKMLTSSMGKITVDKTFELKPHSSKLNVAISPLNT-----ILRGYSIAIDP-----VNDLSISSVTELGDNQDVIIVNDGIFECKIENIHSRRKYLHYEG--                                                        |

Q-Rich Disordered CTD
