# Supplementary material for: Identification of two conserved aspartic acid residues required for DNA digestion by a novel thermophilic Exonuclease VII in Thermotoga maritima
Source: PubMed Central journal article supplement — Nucleic Acids Res. 2008 Sep 23;36(18):5992–6003. doi: 10.1093/nar/gkn588 (PMC2566859; doi:10.1093/nar/gkn588), 2008-09-23
Supplement: gkn588_2.pdf [file gkn588_2.pdf]

|                             |                                                                 |
|-----------------------------|-----------------------------------------------------------------|
| <i>T. maritima</i>          | VMIVRGGGSKEDLWVFNEEDVIREILRLRHPVVTGIGHEIDRVIADFVADVSMHTPTGAA    |
| <i>C. perfringins</i>       | IILGRGGGSIEELWAFNNRDLAYEIFNSRIPTVSAVGHEVDFTISDFVSDMRAPTPSAAAG   |
| <i>T. tengcongensis</i>     | IIVARGGGSLLEEIWPFNEEKVARSIFASRIPVVSAVGHETDFTIADFVADLRAPTPSAAA   |
| <i>M. maripaludis</i>       | IIIARGGGSMEDLWCFNDESLARAI FESKKPVVTGIGHEIDFTISDFVSDLRAATPSNAA   |
| <i>L. acidophilus</i>       | MIIGRGGGSLEDLWPFNEEEVVRQVYNMQMPVISSVGHETDITLCLVADARAATPTAAA     |
| <i>B. clausii</i>           | VIVARGGGGSIEELWAFNEEMVARAIAEAAVPVISAVGHETDFTISDFAADRRAPTPTAAA   |
| <i>S. pneumoniae</i>        | LIIGRGGGSIEDLWAFNEEIVVRAIFESRLPVISSVGHETDVTLADFVADRRRAATPTAAA   |
| <i>B. subtilis</i>          | LIVGRGGGSIEELWAFNEEIVARAI FASNIPIISAVGHETDFTISDFVADIRAATPTGAA   |
| <i>T. denitrificans</i>     | IVLGRGGGSIEDLWAFNEEIVADAI FSAITPIISAVGHEIDWVISDFVADLRAPTPSAAAM  |
| <i>C. jejuni</i>            | LIIARGGGSRDLFCFNENLAREIFKAKTPIISAI GHEIDYVISDFVADFRAPTPSAAI     |
| <i>H. influenza</i>         | LIVGRGGGSLEDLWCFNEEEVARAI FRSTLPIISAVGHETDVTIADFVADLRAPTPSAAA   |
| <i>N. meningitidis</i>      | LIVCRGGGSIEDLWAFNEEPVVRAIESCTVPVVS VGHETDFTLADFVADMRAATPTGAA    |
| <i>L. innocua</i> Clip11262 | MIIGRGGGSLEELWAFNEEPVVRAVYDS DVPVISAVGHETDFALSDFSADVRAATPTAAA   |
| <i>E. faecalis</i>          | MIIGRGGGSIEDLWPFNEEKVARAI HAATTPVISSVGHETDVTIADMVADVRAATPTAAA   |
| <i>L. gasseri</i>           | VIIGRGGGSLEDLWPFNEEKVVRQIYAMQMPVISSVGHETDITLADLVADARAATPTAAA    |
| <i>P. syringae</i>          | LILARGGGSLLEDLWCFNEEAVARAI DACVTPIVSAVGHETDVSISDFVADVRAATPTSAAA |
| <i>M. florum</i> L1         | LIVGRGGGSYEDLWTFNEMKVLKAI VDSSIIPVISAVGHEPDITLSDYVADLRAPTPTAAA  |
| <i>P. putida</i>            | LILARGGGSLLEDLWCFNEEAVARAVA ACVTPIVSAVGHETDVSISDFVADVRAATPTSAAA |
| <i>S. amazonensis</i>       | LLLTRGGGSLEDLWCFNSEALAHAI YNSTLTIIVSAVGHEVDTSIADFVADVRAATPSAGA  |
| <i>M. thermoacetica</i>     | IIIGRGGGSAEDLSAFNTELVARAI YACVPVIAAVGHETDLTLADRVADRRAPTPSAAA    |
| <i>L. interrogans</i>       | IIAGRGGGSFEDLMAFNDEKVVRA YANSRVPPIISAVGHQTDVLLSDFAADHFTPPTAAA   |
| <i>O. oeni</i>              | IIIARGGGSTLDLWPFNDEQLVRL LSSLSKPVISSIGHETDVTLTDLAADYRVETPTAAA   |
| <i>S. typhimurium</i>       | LIVGRGGGSLEDLWSFNDEVARAI FASRIPVVSAVGHETDVTIADFVADLRAPTPSAAA    |
| <i>P. fluorescens</i>       | LILARGGGSLLEDLWCFNEEAVARAV DACVTPIVSAVGHETDVSISDFVADVRAATPTSAAA |
| <i>V. fischeri</i>          | LIVGRGGGSLEDLWCFNEEIVARTI AASEIPIVSAVGHEIDVTIADFVADVRAATPSAAA   |
| <i>S. boydii</i>            | LIVGRGGGSLEDLWSFNDEVARAI FASRIPVVSAVGHETDVTIADFVADLRAPTPSAAA    |
| <i>M. capricolum</i>        | LIVGRGGGSYEDLWAFNELVLLQA IKDSKIPIISAVGHEPDVVLSDFVADIRAATPTAAG   |
| <i>E. coli</i>              | LIVGRGGGSLEDLWSFNDEVARAI FTSRIPVVSAVGHETDVTIADFVADLRAPTPSAAA    |
